# Supplementary material
Source: Springer Nature journal article supplement (https://www.springermedizin.de/resource/supplementary/12985_2010_868_MOESM1_ESM.pdf/9608628)
Supplement: MOESM1 [file 9608628]

Copies  
Per Cell

BHK

Vero

U2OS

C33A

293

0.8

0.08

-

+

-

+

-

+

-

+

-

+

DpnI

Linearized  
WT plasmid

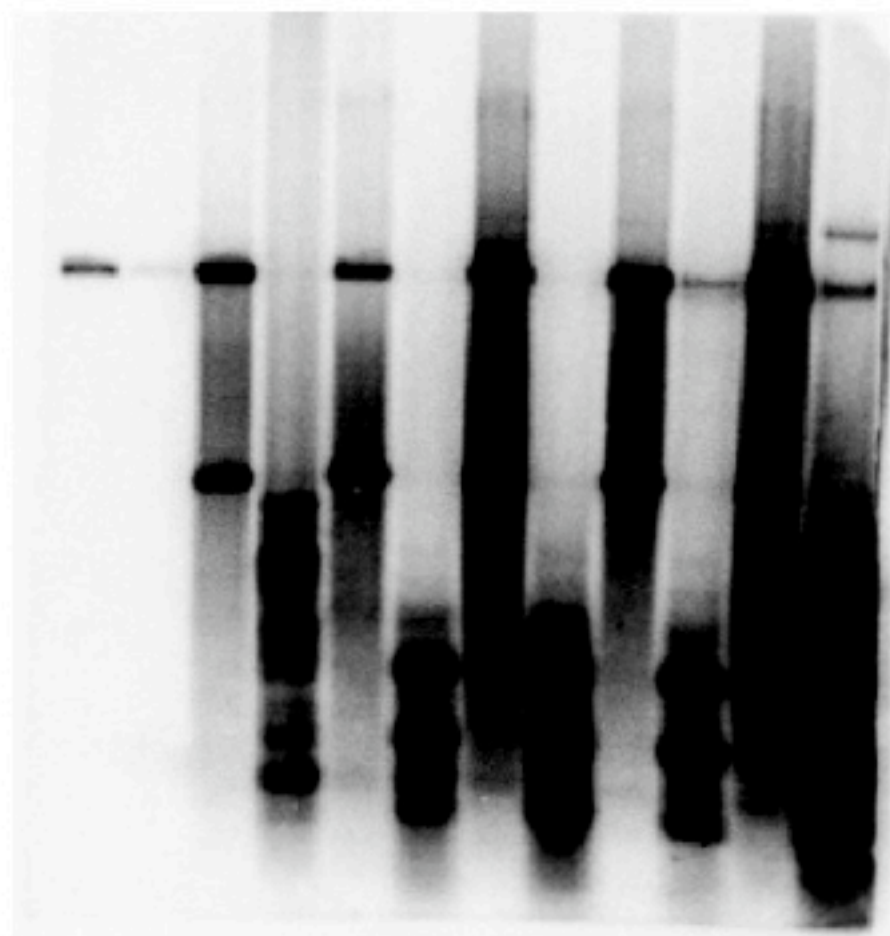

Test  
plasmid

Spiked  
plasmid

DpnI  
digested  
products
